# Supplementary material
Source: publisher figshare collection journal article supplement (https://acs.figshare.com/ndownloader/files/4095205)

# ***t*-Bu<sub>3</sub>P-Coordinated 2-Phenylaniline-Based Palladacycle Complex as a Precatalyst for the Suzuki Cross-coupling Polymerization of Aryl Dibromides with Aryldiboronic Acids**

Hong-Hai Zhang, Chun-Hui Xing, Georges Bouobda Tsemo and Qiao-Sheng Hu\*

Department of Chemistry, College of Staten Island and Graduate Center of the City University of New York,  
Staten Island, New York, 10314, United States  
QiaoSheng.Hu@csi.cuny.edu

## **Supporting Information**

**General:** <sup>1</sup>H, <sup>31</sup>P, <sup>13</sup>C NMR spectra were recorded on Varian 600 MHz NMR spectrometer. Chemical shifts were determined relative to internal (CH<sub>3</sub>)<sub>4</sub>Si (TMS). All yields reported refer to isolated yields unless otherwise indicated. *M<sub>n</sub>* and *M<sub>w</sub>/M<sub>n</sub>* (PDI) value of polymers were measured with gel permeation chromatography (Waters alliance GPC 2000) using THF as eluent (1 mL/min) at 40 °C, which were calibrated with polystyrene standards. Melting points were measured on a Fisher-Johns Melting Point Apparatus and uncorrected.

1,4-Dibromo-2,5-bis(hexyloxy)benzene, 2,5-bis(hexyloxy)-1,4-phenylenediboronic acid were prepared according to the reported procedure.<sup>1</sup> 7-Dibromo-9,9-dioctyl-9H-fluorene, 2,7-dibromo-9,9-dihexyl-9H-fluorene, 9,9-dioctyl-2,7-bis(4,4',5,5'-tetramethyl-1,3,2-dioxaborolan-2-yl)-9H-fluorene and 9,9-dihexyl-2,7-bis(4,4',5,5'-tetramethyl-1,3,2-dioxaborolan-2-yl)-9H-fluorene are prepared in a way similar to the literature.<sup>2</sup> Ferrocenylmethyl alcohol was also prepared according to reported literature.<sup>3</sup> Complexes **1b** and **1d** were prepared by following reported method.<sup>4</sup> The purity of these monomers was estimated to be greater than 98% as determined by <sup>1</sup>H NMR or GC-MS. The product purity was estimated to be greater than 95% as determined by <sup>1</sup>H NMR. THF was freshly distilled from sodium/benzophenone. Unless otherwise mentioned, other solvents and reagents were purchased from commercial sources and used as received.

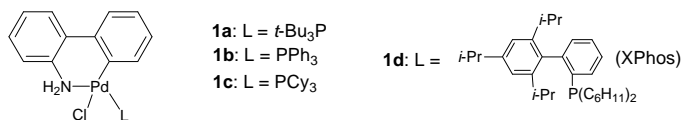

**General Procedure for the Synthesis of precatalyst 1a and 1c:** In a glovebox, a mixture of Pd(OAc)<sub>2</sub> (336 mg, 1.5 mmol) and 2-aminobiphenyl (264 mg, 1.5 mmol) in anhydrous toluene (10 mL) was heated at 60 °C under N<sub>2</sub> atmosphere for 30 min. After the reaction was cooled to room temperature, the toluene was removed. The remaining solid was washed with anhydrous toluene (2 x 2 mL) and then suspended in anhydrous acetone (10 mL). Lithium chloride (191 mg, 4.5 mmol) was added to the suspension and the mixture was stirred at room temperature under N<sub>2</sub> atmosphere for

1 h. *t*-Bu<sub>3</sub>P or PCy<sub>3</sub> (1.4 mmol) was then added to the solution. The mixture was stirred at room temperature for 2.5 h. Removal of about 90% of the solvent under vacuum afforded yellow slurry, which was treated with methyl *t*-butyl ether (5 mL) and pentane (10 mL). The mixture was then placed in refrigerator for 1 h. Then, the mixture was filtered, washed with water and pentane and dried under vacuum to afford complex **1a** or **1c**.

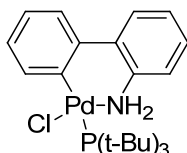

**1a**: Yield: 58% Yellow solid. Mp: 164.0-164.4 °C. <sup>1</sup>H NMR (600 MHz, CDCl<sub>3</sub>): δ 7.47 (dd, *J* = 3.6 Hz, *J* = 7.2 Hz, 1 H), 7.42 (d, *J* = 7.8 Hz, 1 H), 7.14 ~ 7.20 (m, 4 H), 7.02 (t, *J* = 7.2 Hz, 1 H), 6.96 (t, *J* = 7.2 Hz, 1 H), 5.08 (s, 1 H), 4.41 (s, 1 H), 1.31 (d, *J* = 12.6 Hz, 27 H) ppm. <sup>13</sup>C NMR (125 MHz, CDCl<sub>3</sub>): δ 146.4, 140.1, 139.0, 138.2, 138.2, 136.1, 128.1, 126.7, 126.4, 125.0, 124.7, 119.0, 39.9, 32.6 ppm. <sup>31</sup>P NMR (121 MHz, CDCl<sub>3</sub>): δ 77.79 ppm. HRMS (ESI) Calcd for: C<sub>24</sub>H<sub>37</sub>NPPd ([M+H-HCl]<sup>+</sup>) 476.1698. Found: 476.1703.

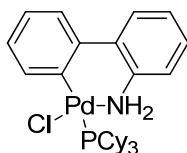

**1c**:<sup>5</sup> Yield: 63% Gray solid. Mp: 228.9-229.3 °C. <sup>1</sup>H NMR (600 MHz, CDCl<sub>3</sub>): δ 7.41 (d, *J* = 6.6 Hz, 1 H), 7.31 (dd, *J* = 1.8 Hz, *J* = 7.2 Hz, 1 H), 7.16 ~ 7.23 (m, 4 H), 7.07 (t, *J* = 7.2 Hz, 1 H), 7.03 (t, *J* = 7.2 Hz, 1 H), 4.70 (br, 1 H), 4.61 (br, 1 H), 2.08 (q, *J* = 12.0 Hz, 3 H), 1.93 (d, *J* = 11.4 Hz, 3 H), 1.72 (s, 3 H), 1.54 ~ 1.62 (m, 9 H), 1.35 ~ 1.48 (m, 6 H), 1.11 ~ 1.19 (m, 6 H), 0.88 ~ 0.90 (m, 3 H) ppm. <sup>13</sup>C NMR (125 MHz, CDCl<sub>3</sub>): δ 153.2, 140.3, 140.1, 137.5, 135.5, 127.9, 127.4, 127.2, 125.4, 125.0, 124.9, 119.9, 33.7 (d, *J* = 19 Hz), 30.0, 29.2, 27.6 (d, *J* = 9.2 Hz), 27.4 (d, *J* = 8.7 Hz), 26.3 ppm. <sup>31</sup>P NMR (121 MHz, CDCl<sub>3</sub>): δ 42.08 ppm. HRMS (ESI) Calcd for: C<sub>30</sub>H<sub>43</sub>NPPd ([M+H-HCl]<sup>+</sup>) 554.2168. Found: 554.2174.

**General Procedure for the Suzuki cross-coupling polymerization:** Under N<sub>2</sub> atmosphere, to a solution of dibromide monomer (0.101 mmol) and diboronic acid monomer (0.1 mmol) in dry THF (0.5 mL), precatalyst **1a** (0.002 mmol, 2 mmol%) was added. K<sub>3</sub>PO<sub>4</sub> solution (2 M, 0.2 mL) was then added to the mixture. After stirring at 60 °C for 1 h, the mixture was poured into HCl solution (5 M, 10 mL) with stirring. The product was extracted with CH<sub>2</sub>Cl<sub>2</sub> (3 x 15 mL), the combined organic layer was washed with brine and dried over Na<sub>2</sub>SO<sub>4</sub>. After removal of solvents under vacuum, the residue was dissolved in a small amount of THF and added slowly to methanol with stirring. The precipitation formed was collected by filtration, washed with methanol. The dissolution-precipitation process was repeated two more times to

afford the final product, which was dried under vacuum for 4 h.

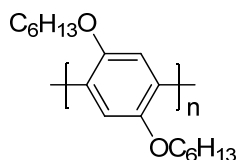

Yellow solid.  $^1\text{H}$  NMR (600 MHz,  $\text{CDCl}_3$ ):  $\delta$  7.09 (s, 2 H), 3.92 (s, 4 H), 1.67 ~ 1.68 (m, 4 H), 1.27 ~ 1.36 (m, 12 H), 0.87 (t,  $J$  = 6.0 Hz, 6 H) ppm.  $^{13}\text{C}$  NMR (125 MHz,  $\text{CDCl}_3$ ):  $\delta$  150.0, 127.5, 117.2, 69.5, 31.6, 29.5, 25.7, 22.6, 14.0 ppm. GPC profile:  $M_n$  = 19 800 (PDI = 2.25).

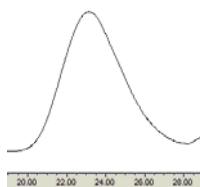

The polymerization was repeated and the polymer was obtained with a  $M_n$  = 19 500 (PDI = 2.35).

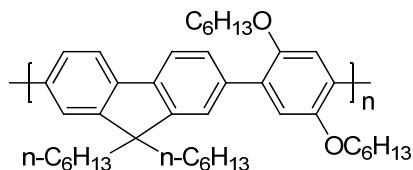

Yellow solid.  $^1\text{H}$  NMR (600 MHz,  $\text{CDCl}_3$ ):  $\delta$  7.71 ~ 7.81 (m, 4 H), 7.58 ~ 7.63 (m, 2 H), 7.14 (s, 2 H), 3.99 (t,  $J$  = 6.0 Hz, 4 H), 2.04 (br, 4 H), 1.75 (t,  $J$  = 6.6 Hz, 4 H), 1.30 ~ 1.41 (m, 16 H), 1.05 ~ 1.21 (m, 12 H), 0.88 (t,  $J$  = 6.6 Hz, 6 H), 0.82 (t,  $J$  = 6.6 Hz, 6 H) ppm.  $^{13}\text{C}$  NMR (125 MHz,  $\text{CDCl}_3$ , ppm):  $\delta$  150.5, 150.4, 139.8, 137.0, 131.2, 127.9, 124.4, 121.5, 119.1, 116.7, 69.8, 55.0, 40.6, 31.6, 31.5, 29.9, 29.4, 25.7, 22.7, 22.6, 14.0, 14.0 ppm. GPC profile:  $M_n$  = 11 500 (PDI = 2.38).

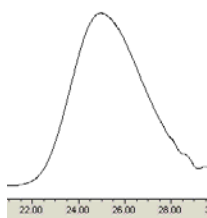

The polymerization was repeated and the polymer was obtained with a  $M_n = 10\,800$  (PDI = 2.17).

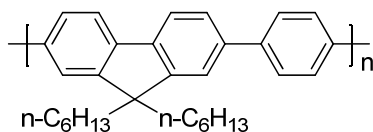

Brown solid.  $^1\text{H}$  NMR (600 MHz,  $\text{CDCl}_3$ ):  $\delta$  7.80 ~ 7.84 (m, 6 H), 7.66 ~ 7.69 (m, 4 H), 2.10 (br, 4 H), 1.10 ~ 1.16 (m, 12 H), 0.76 ~ 0.80 (m, 10 H) ppm.  $^{13}\text{C}$  NMR (125 MHz,  $\text{CDCl}_3$ ):  $\delta$  151.8, 140.7, 140.0, 139.5, 127.6, 126.2, 121.4, 119.9, 55.2, 40.6, 31.4, 29.6, 23.8, 22.5, 14.0 ppm. GPC profile:  $M_n = 42\,000$  (PDI = 2.85).

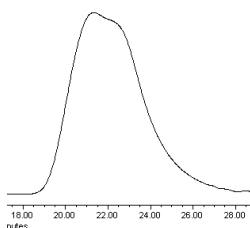

The polymerization was repeated and the polymer was obtained with a  $M_n = 44\,000$  (PDI = 2.23).

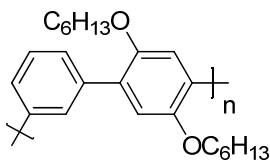

Brown solid.  $^1\text{H}$  NMR (600 MHz,  $\text{CDCl}_3$ ):  $\delta$  7.85 (s, 1 H), 7.64 (d,  $J = 5.4$  Hz, 2 H), 7.47 (t,  $J = 4.8$  Hz, 2 H), 7.10 (s, 2 H), 3.96 (t,  $J = 6.0$  Hz, 4 H), 1.72 (s, 4 H), 1.24 ~ 1.37 (m, 16 H), 0.84 (s, 6 H) ppm.  $^{13}\text{C}$  NMR (125 MHz,  $\text{CDCl}_3$ , ppm):  $\delta$  150.3, 138.1, 130.8, 130.3, 128.3, 127.3, 116.4, 116.2, 69.6, 31.5, 29.4, 25.8, 22.5, 22.5, 14.0, 14.0, 14.0 ppm. GPC profile:  $M_n = 9\,400$  (PDI = 1.86).

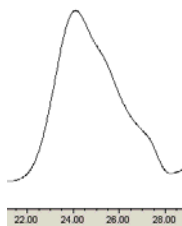

The polymerization was repeated and the polymer was obtained with a  $M_n = 8\,100$  (PDI = 2.10).

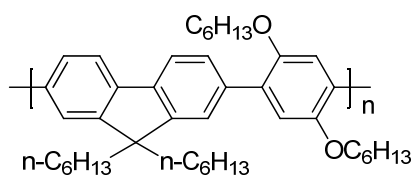

Brown solid.  $^1\text{H}$  NMR (600 MHz,  $\text{CDCl}_3$ ):  $\delta$  7.71 ~ 7.81 (m, 4 H), 7.58 ~ 7.63 (m, 2 H), 7.14 (s, 2 H), 3.99 (t,  $J = 6.0$  Hz, 4 H), 2.04 (br, 4 H), 1.75 (t,  $J = 6.6$  Hz, 4 H), 1.30 ~ 1.41 (m, 16 H), 1.05 ~ 1.21 (m, 12 H), 0.88 (t,  $J = 6.6$  Hz, 6 H), 0.82 (t,  $J = 6.6$  Hz, 6 H) ppm.  $^{13}\text{C}$  NMR (125 MHz,  $\text{CDCl}_3$ ):  $\delta$  150.5, 150.4, 139.8, 137.0, 131.2, 127.9, 124.4, 121.5, 119.1, 116.7, 69.8, 55.0, 40.6, 31.6, 31.5, 29.9, 29.4, 25.7, 22.7, 22.6, 14.0, 14.0 ppm. GPC profile:  $M_n$  20 900 (PDI = 2.52).

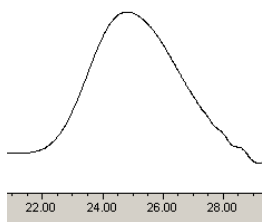

The polymerization was repeated and the polymer was obtained with a  $M_n = 20\,500$  (PDI = 2.26).

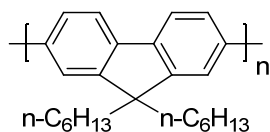

Brown solid.  $^1\text{H}$  NMR (600 MHz,  $\text{CDCl}_3$ ):  $\delta$  7.84 (d,  $J = 7.8$  Hz, 2 H), 7.67 ~ 7.70 (m,

4 H), 2.12 (br, 4 H), 1.13 ~ 1.17 (m, 16 H), 0.79 (t,  $J = 7.2$  Hz, 6 H) ppm.  $^{13}\text{C}$  NMR (125 MHz,  $\text{CDCl}_3$ ):  $\delta$  151.8, 140.5, 140.0, 126.1, 121.0, 119.9, 55.4, 40.2, 31.4, 29.6, 22.5, 14.0 ppm. GPC profile:  $M_n$  19 300 (PDI = 2.83).

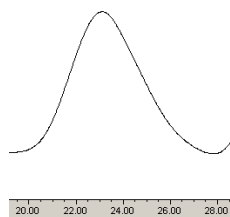

The polymerization was repeated and the polymer was obtained with a  $M_n = 18\,900$  (PDI = 3.04).

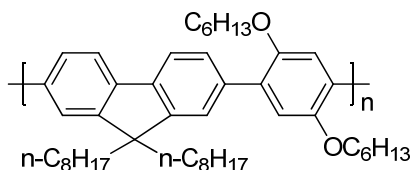

Brown solid.  $^1\text{H}$  NMR (600 MHz,  $\text{CDCl}_3$ ):  $\delta$  7.72 ~ 7.80 (m, 4 H), 7.58 (d,  $J = 6.0$  Hz, 2 H), 7.13 (s, 2 H), 3.98 (t,  $J = 6.0$  Hz, 4 H), 2.04 (br, 4 H), 1.74 (t,  $J = 7.2$  Hz, 4 H), 1.30 ~ 1.41 (m, 16 H), 1.08 ~ 1.16 (m, 20 H), 0.88 (t,  $J = 7.2$  Hz, 6 H), 0.78 (t,  $J = 7.2$  Hz, 6 H) ppm.  $^{13}\text{C}$  NMR (125 MHz,  $\text{CDCl}_3$ ):  $\delta$  150.5, 150.4, 139.8, 137.0, 131.2, 127.9, 124.4, 119.1, 116.8, 69.8, 55.0, 40.5, 31.8, 31.5, 30.3, 29.4, 29.4, 29.4, 29.1, 29.1, 25.8, 24.1, 22.6, 22.6, 14.0, 14.0 ppm. GPC profile:  $M_n$  19 800 (PDI = 2.67).

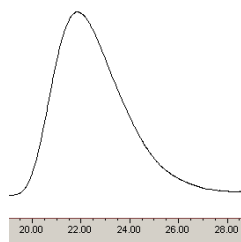

The polymerization was repeated and the polymer was obtained with a  $M_n = 18\,900$  (PDI = 2.11).

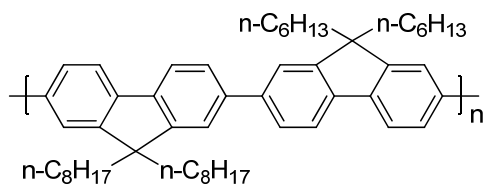

Yellow solid.  $^1\text{H}$  NMR (600 MHz,  $\text{CDCl}_3$ ):  $\delta$  7.84 (d,  $J = 7.2$  Hz, 4 H), 7.67 ~ 7.70 (m, 8 H), 2.12 (br, 4 H), 1.14 ~ 1.22 (m, 36 H), 0.78 ~ 0.84 (m, 20 H) ppm.  $^{13}\text{C}$  NMR (125 MHz,  $\text{CDCl}_3$ ):  $\delta$  152.5, 151.7, 140.5, 139.9, 139.0, 130.1, 126.1, 121.4, 121.1, 119.9, 55.3, 40.3, 40.1, 31.7, 31.4, 30.0, 29.8, 29.6, 29.2, 23.9, 23.8, 23.9, 22.6, 22.5, 14.0, 14.0 ppm. GPC profile:  $M_n$  45 300 (PDI = 2.10).

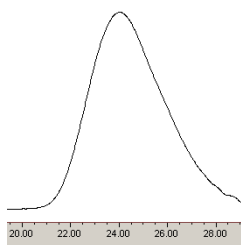

The polymerization was repeated and the polymer was obtained with a  $M_n = 40\,700$  (PDI = 2.30).

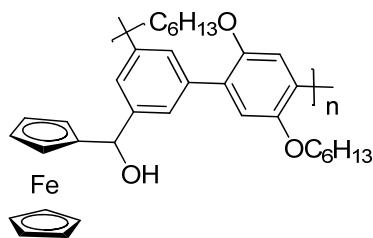

Red solid.  $^1\text{H}$  NMR (600 MHz,  $\text{CDCl}_3$ ):  $\delta$  7.65 ~ 7.69 (m, 3 H), 7.04 (s, 2 H), 5.57 (s, 1 H), 4.17 ~ 4.34 (m, 9 H), 3.90 (t,  $J = 6.0$  Hz, 4 H), 2.45 (s, 1 H), 1.66 ~ 1.69 (m, 4 H), 1.22 ~ 1.33 (m, 16 H), 0.83 (s, 6 H) ppm.  $^{13}\text{C}$  NMR (125 MHz,  $\text{CDCl}_3$ ):  $\delta$  150.3, 142.3, 138.0, 130.7, 126.3, 116.3, 94.2, 72.4, 69.6, 68.4, 68.07, 68.0, 67.5, 66.1, 31.5, 29.4, 25.8, 22.6, 14.0 ppm. GPC profile:  $M_n = 7\,900$  (PDI = 1.69).

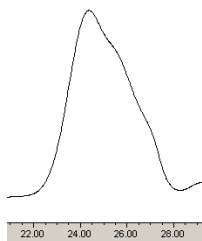

The polymerization was repeated and the polymer was obtained with a  $M_n = 8\,400$  (PDI = 1.70).

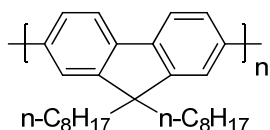

Yellow solid.  $^1\text{H}$  NMR (600 MHz,  $\text{CDCl}_3$ ):  $\delta$  7.84 (d,  $J = 7.2$  Hz, 2 H), 7.67 ~ 7.70 (m, 4 H), 2.12 (br, 4 H), 1.14 ~ 1.24 (m, 24 H), 0.79 ~ 0.84 (m, 10 H) ppm.  $^{13}\text{C}$  NMR (125 MHz,  $\text{CDCl}_3$ ):  $\delta$  151.8, 140.4, 140.0, 126.1, 121.4, 119.9, 55.3, 40.3, 31.7, 30.0, 29.2, 24.8, 23.8, 22.6, 14.0 ppm. GPC profile:  $M_n = 77\,600$  (PDI = 2.45).

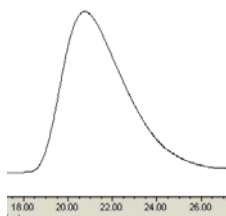

The polymerization was repeated and the polymer was obtained with a  $M_n = 88\,300$  (PDI = 2.26).

## References:

1. Maruyama, S.; Kawanishi, Y., *J. Mater. Chem.* **2002**, *12*, 2245-2249.
2. Cho, S. Y.; Grimsdale, A. C.; Jones, D. J.; Watkins, S. E.; Holmes, A. B., *J. AM. Chem. Soc* **2007**, *129*, 11910-11911.
3. Hu, Q.-S.; Lu, Y.; Tang, Z.-Y.; Yu, H.-B., *J. Am. Chem. Soc* **2003**, *125*, 2856-2857.
4. (a) Hughes, G.; Wang, C.; Batsanov, A. S.; Fern, M.; Frank, S.; Bryce, M. R.; Perepichka, I. F.; Monkman, A. P.; Lyons, B. P., *Org. Biomol. Chem.* **2003**, *1* (17), 3069. (b) Kinzel, T.; Zhang, Y.; Buchwald, S. L., *J. AM. Chem. Soc* **2010**, *132*, 14073-14075.
5. Gorelsky, S. I.; Lapointe, D.; Fagnou, K. *J. Org. Chem.* **2012**, *77*, 658-668.
6. Albert, J.; Granell, J.; Zafrilla, J.; Font-Bardia, M.; Solans, X., *J. Organomet.*



*Chem.* **2005**, 690, 422-429.

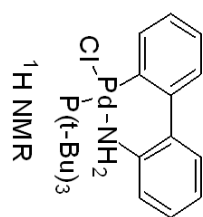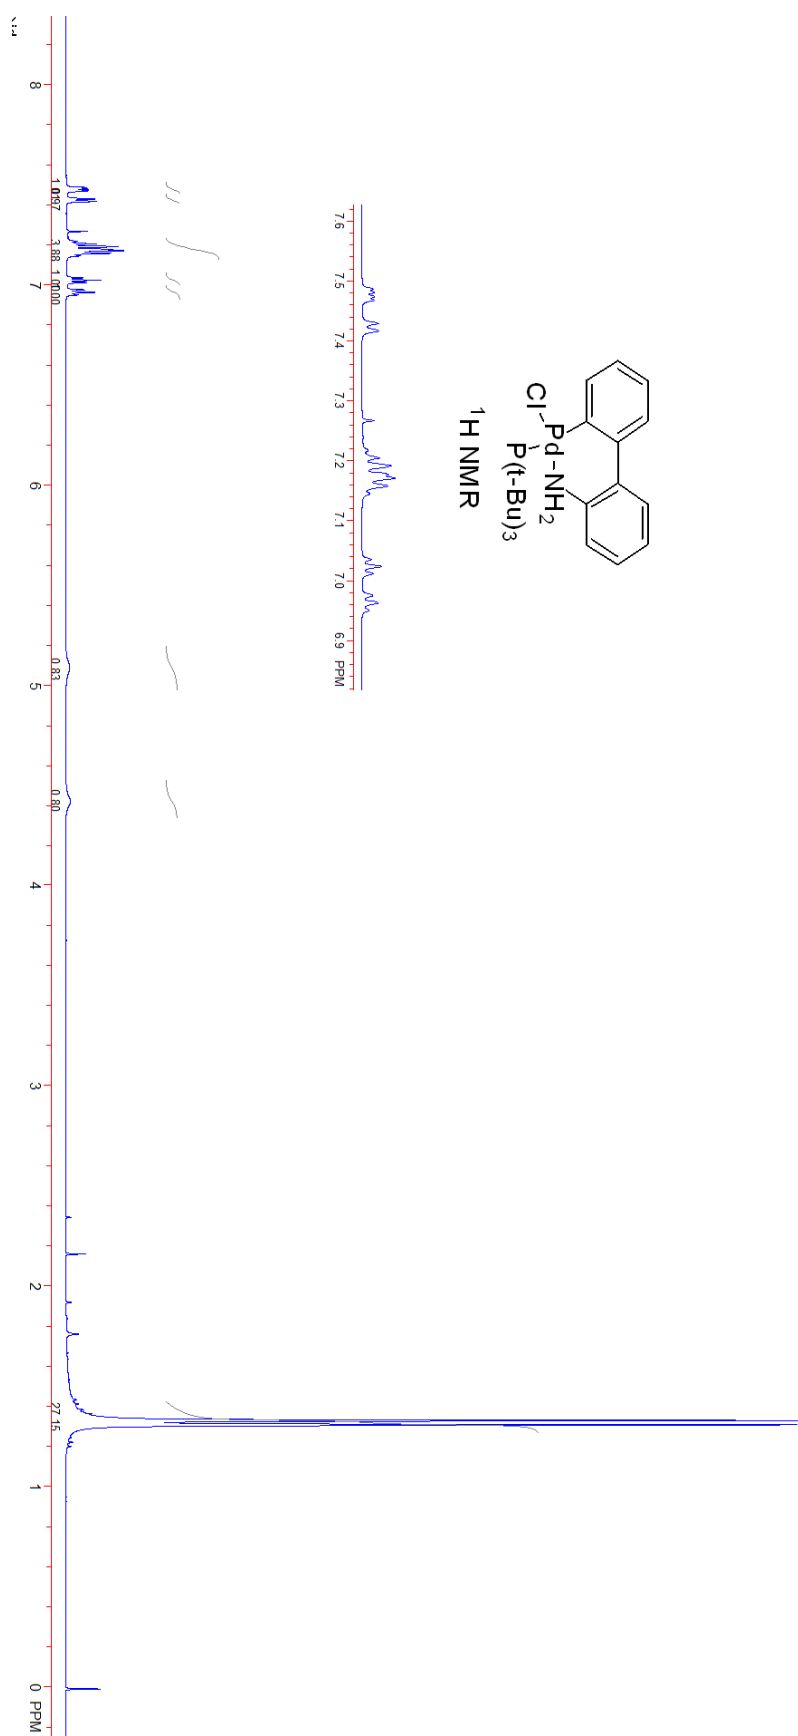

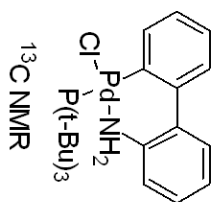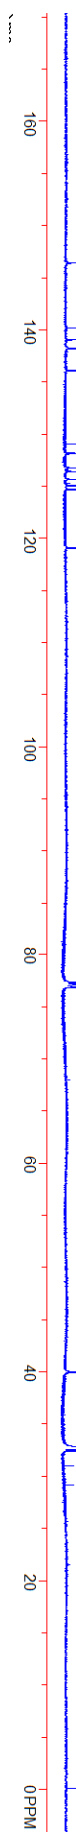

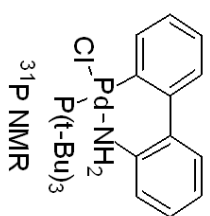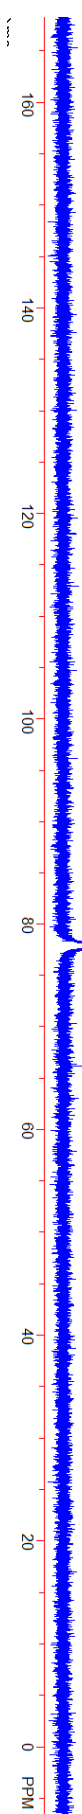

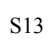

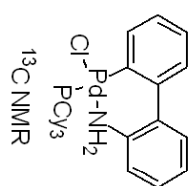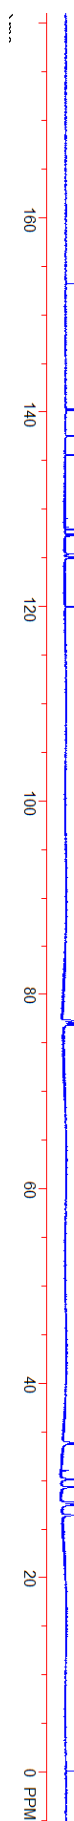

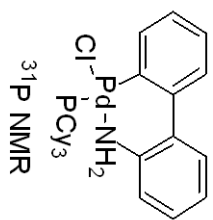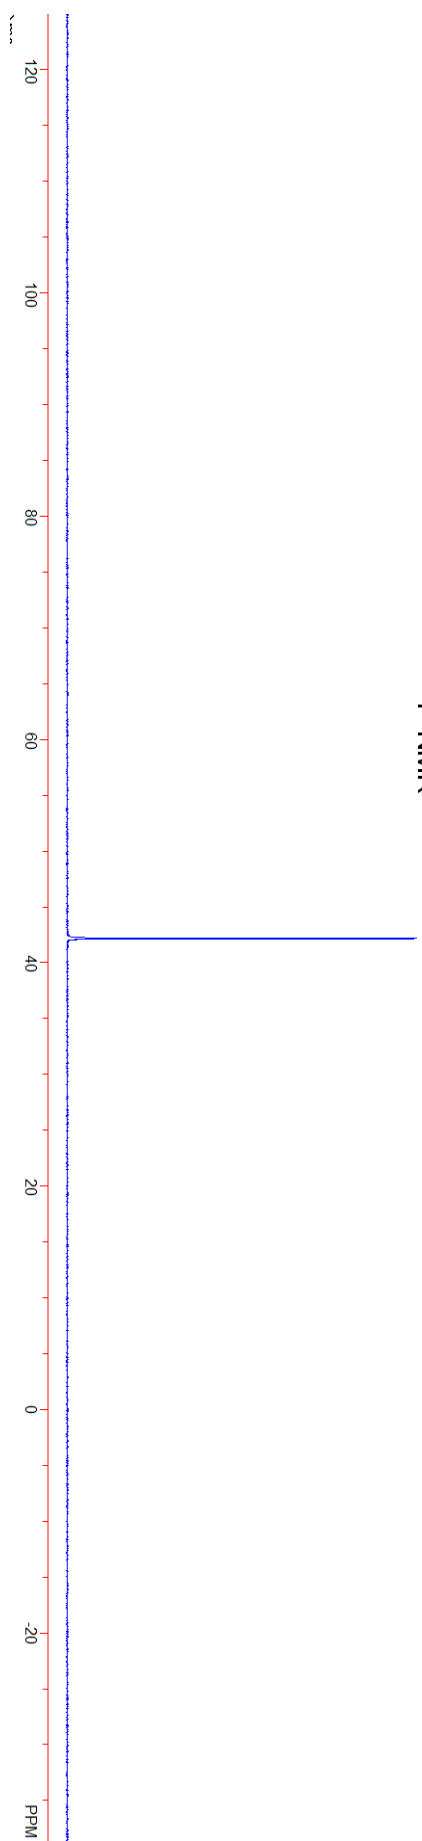

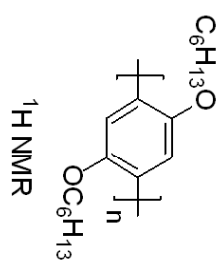

$^1\text{H NMR}$

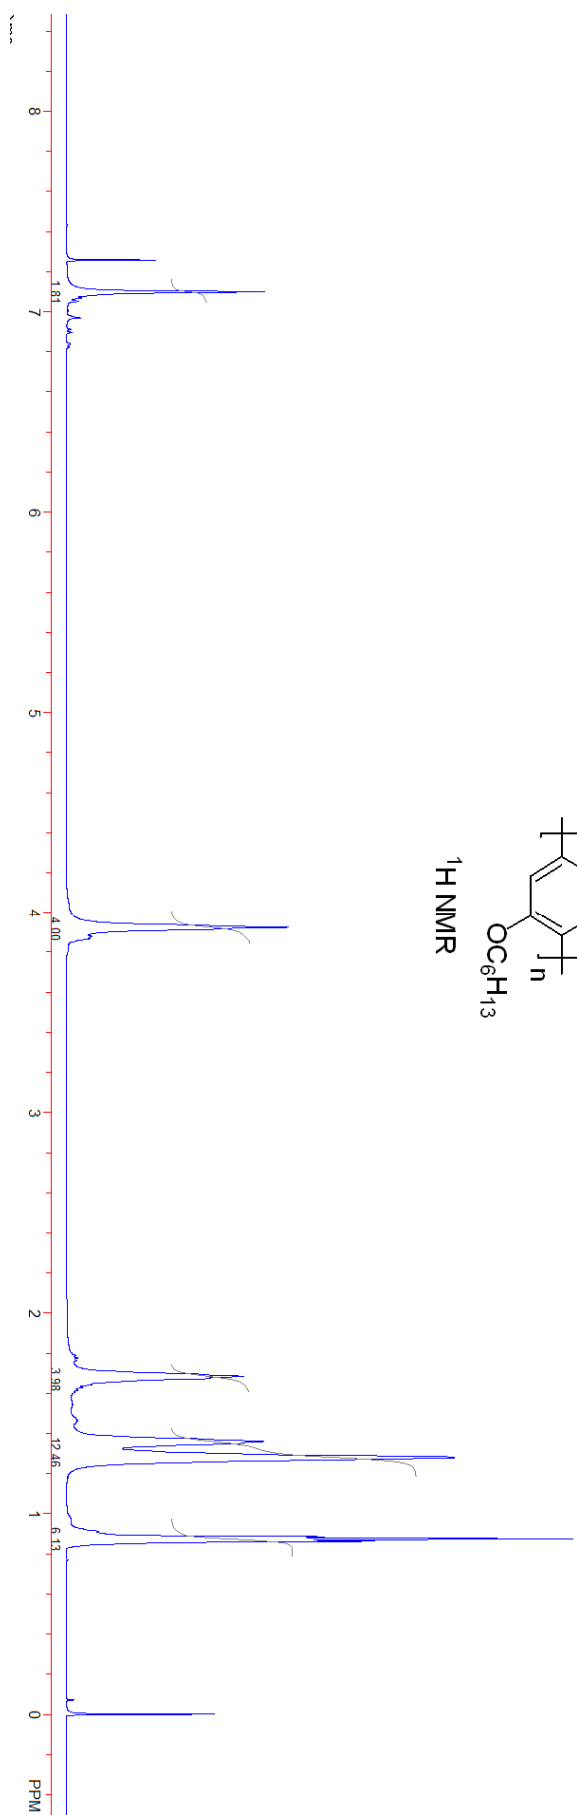



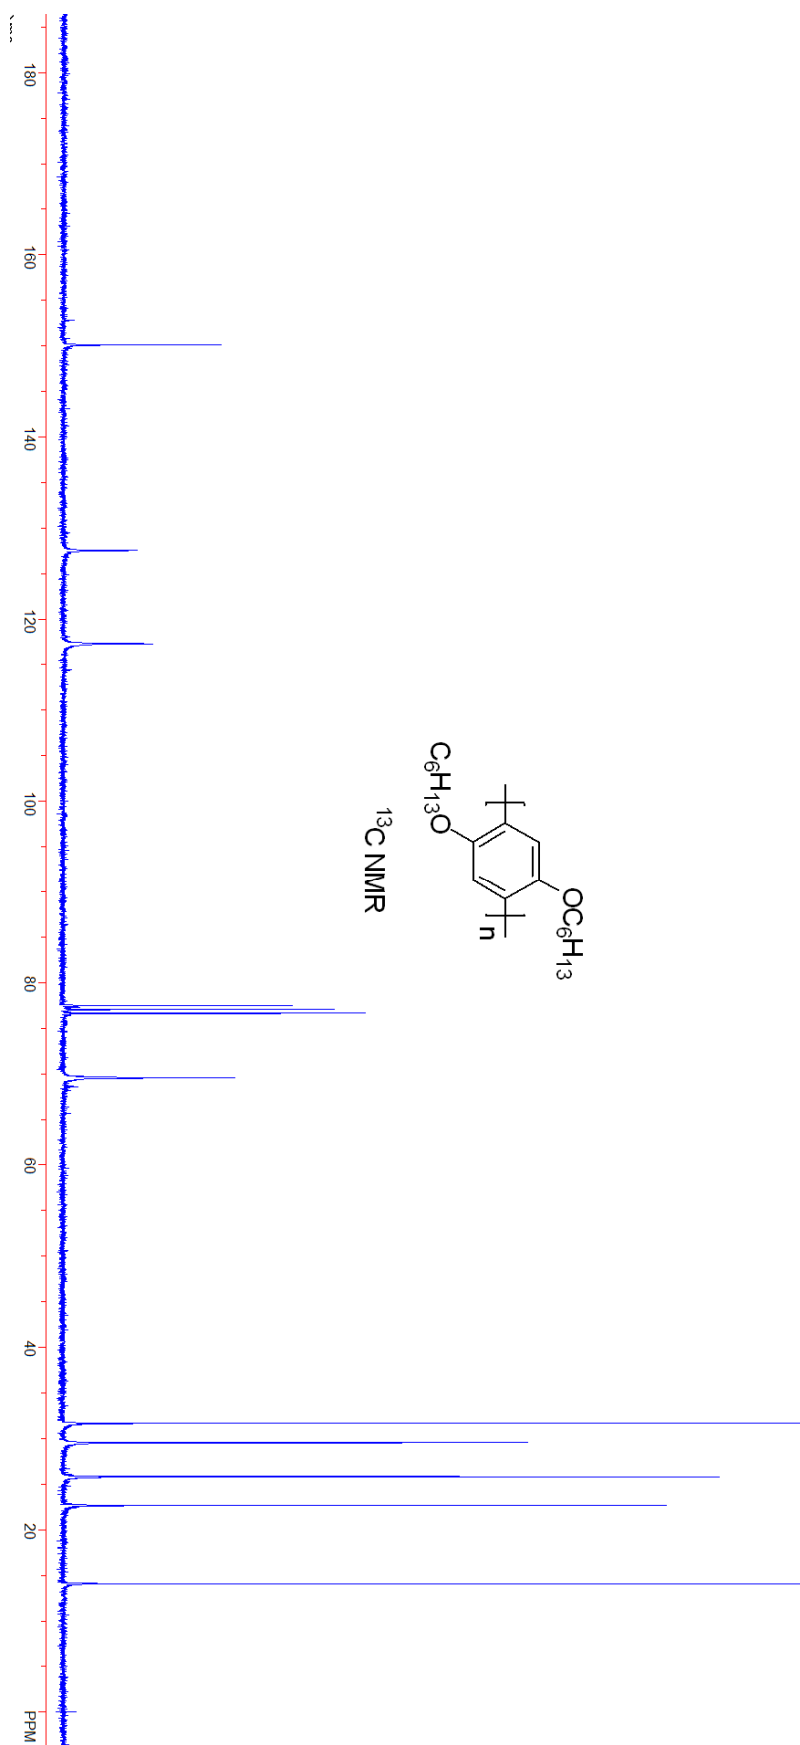

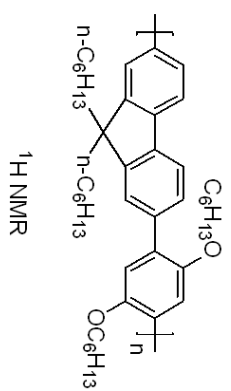

$^1\text{H}$  NMR

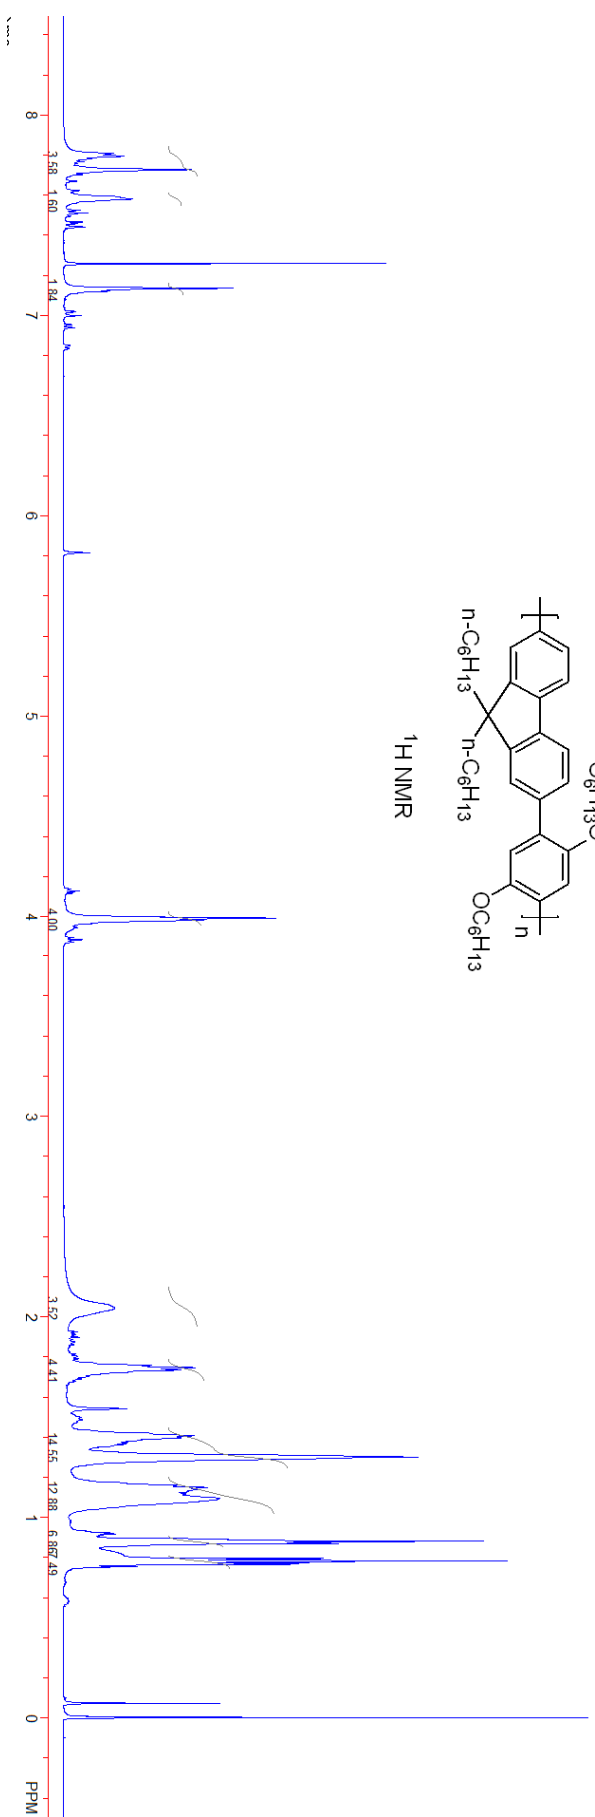

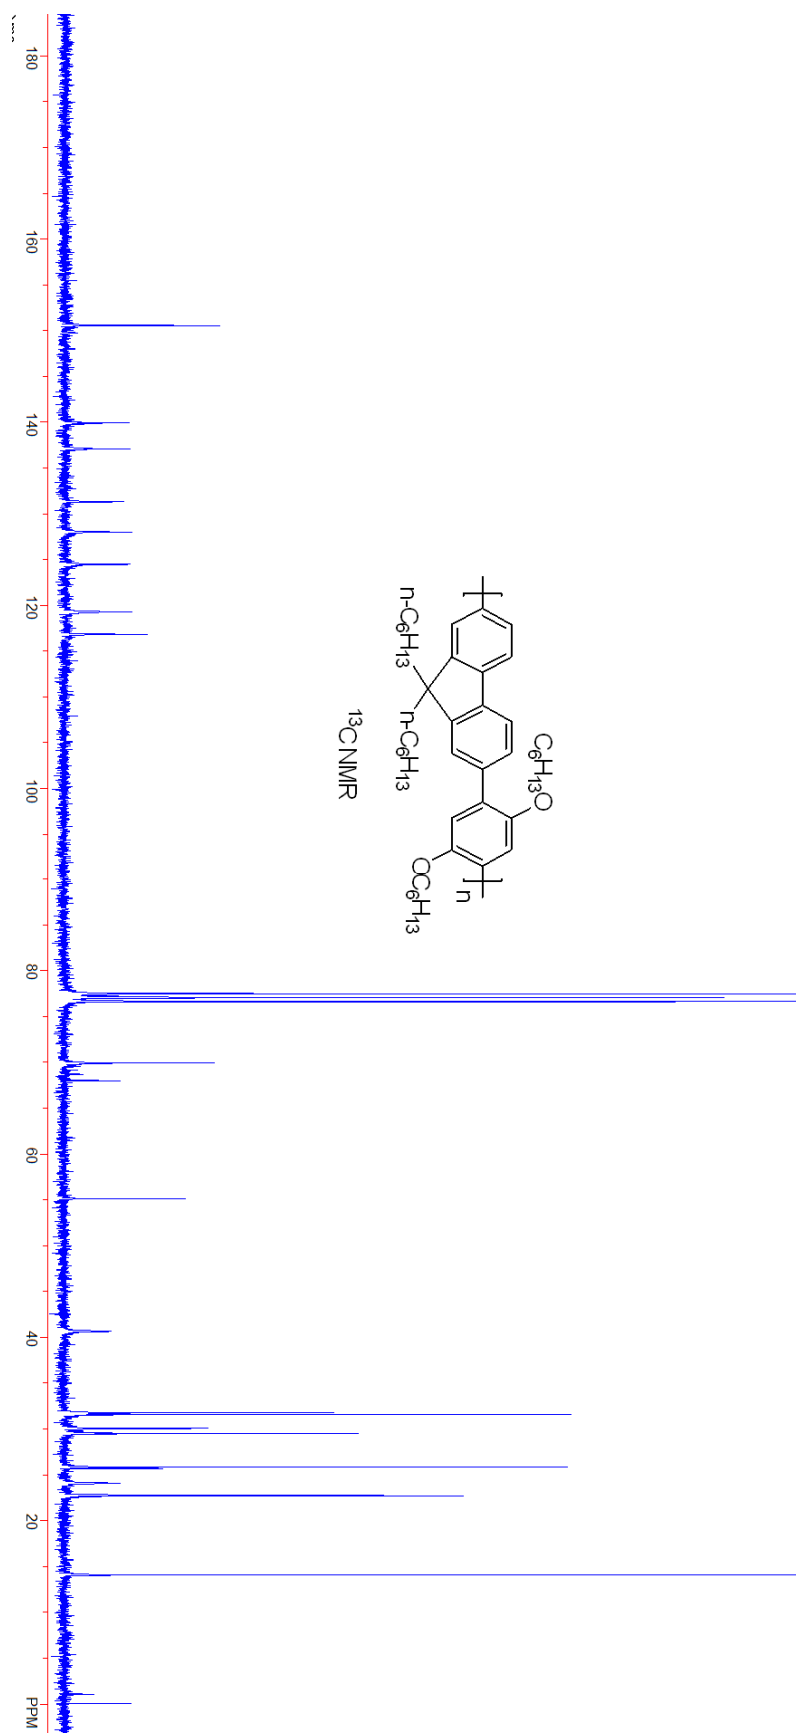

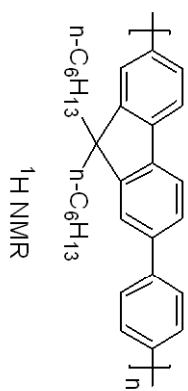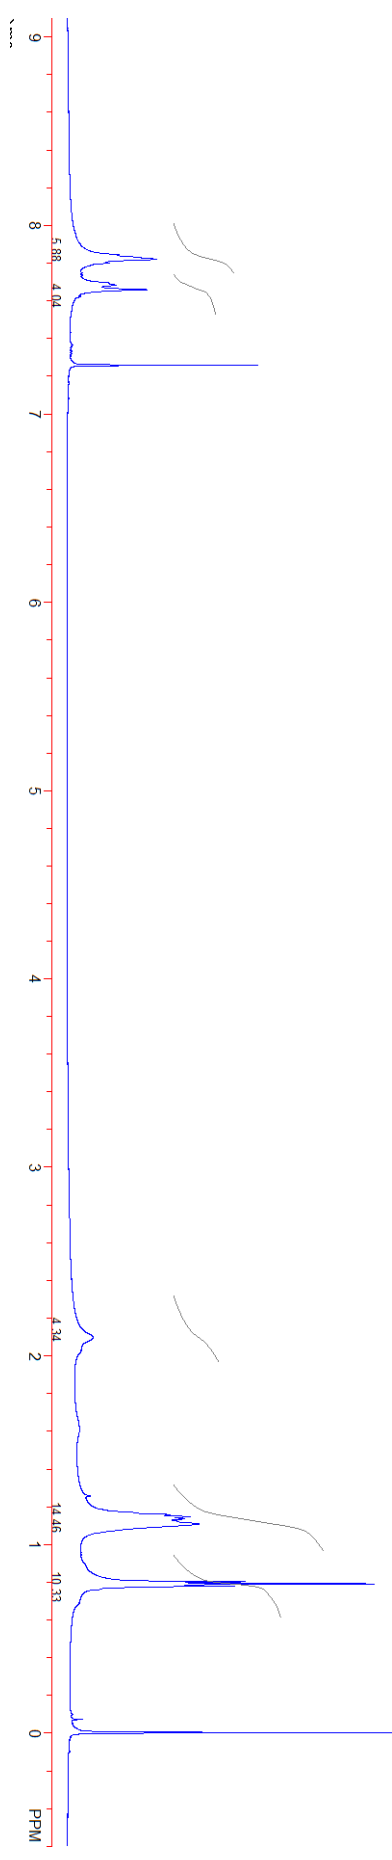

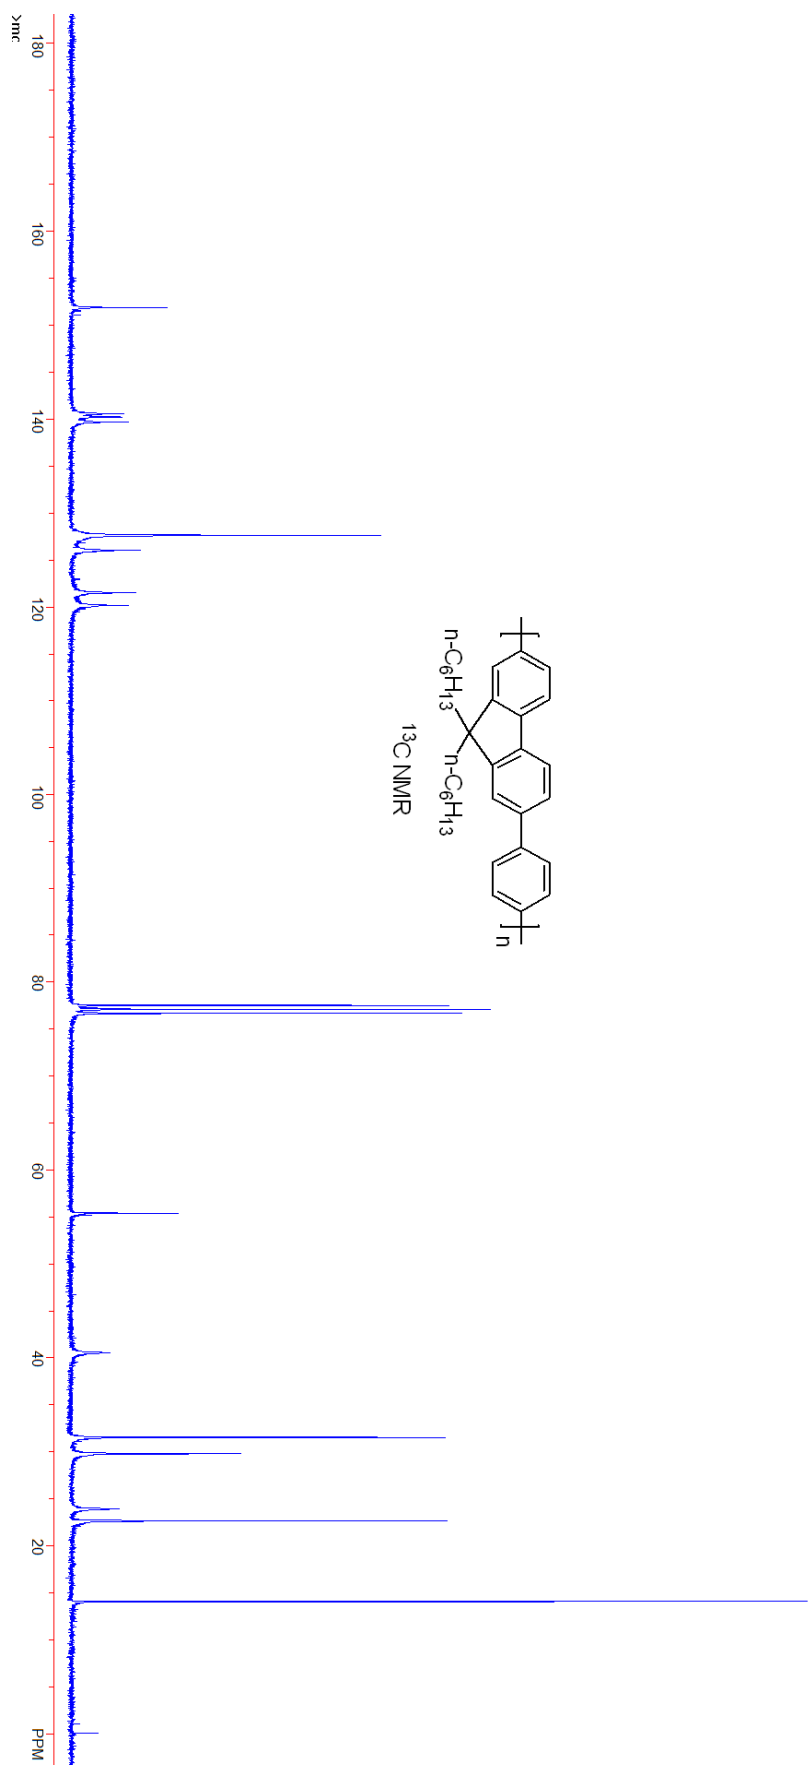

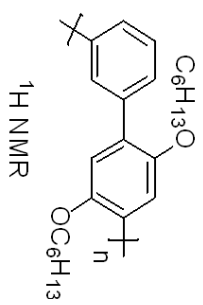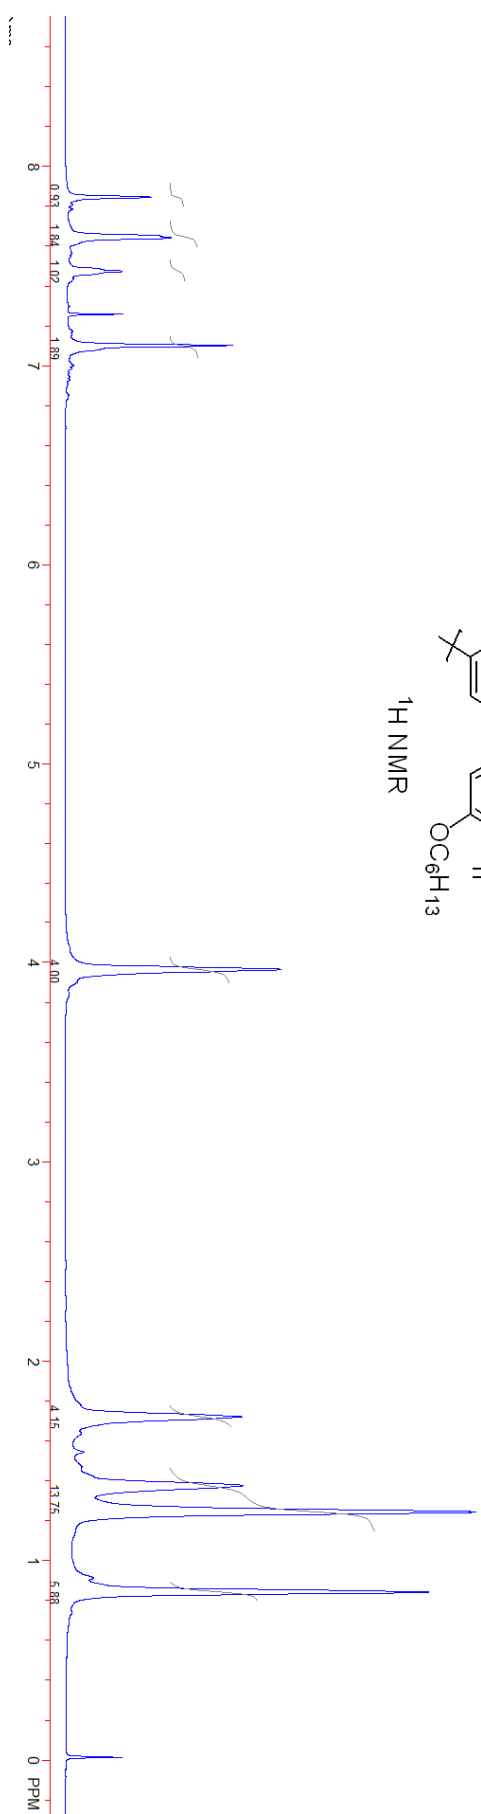

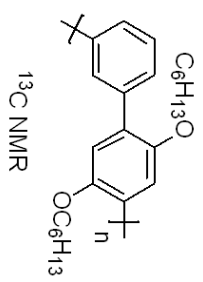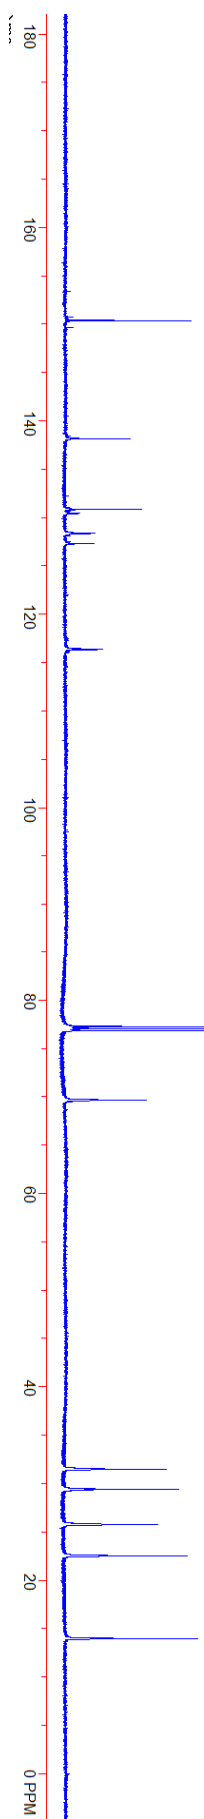

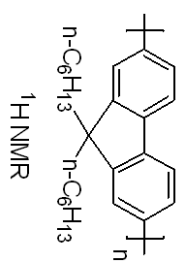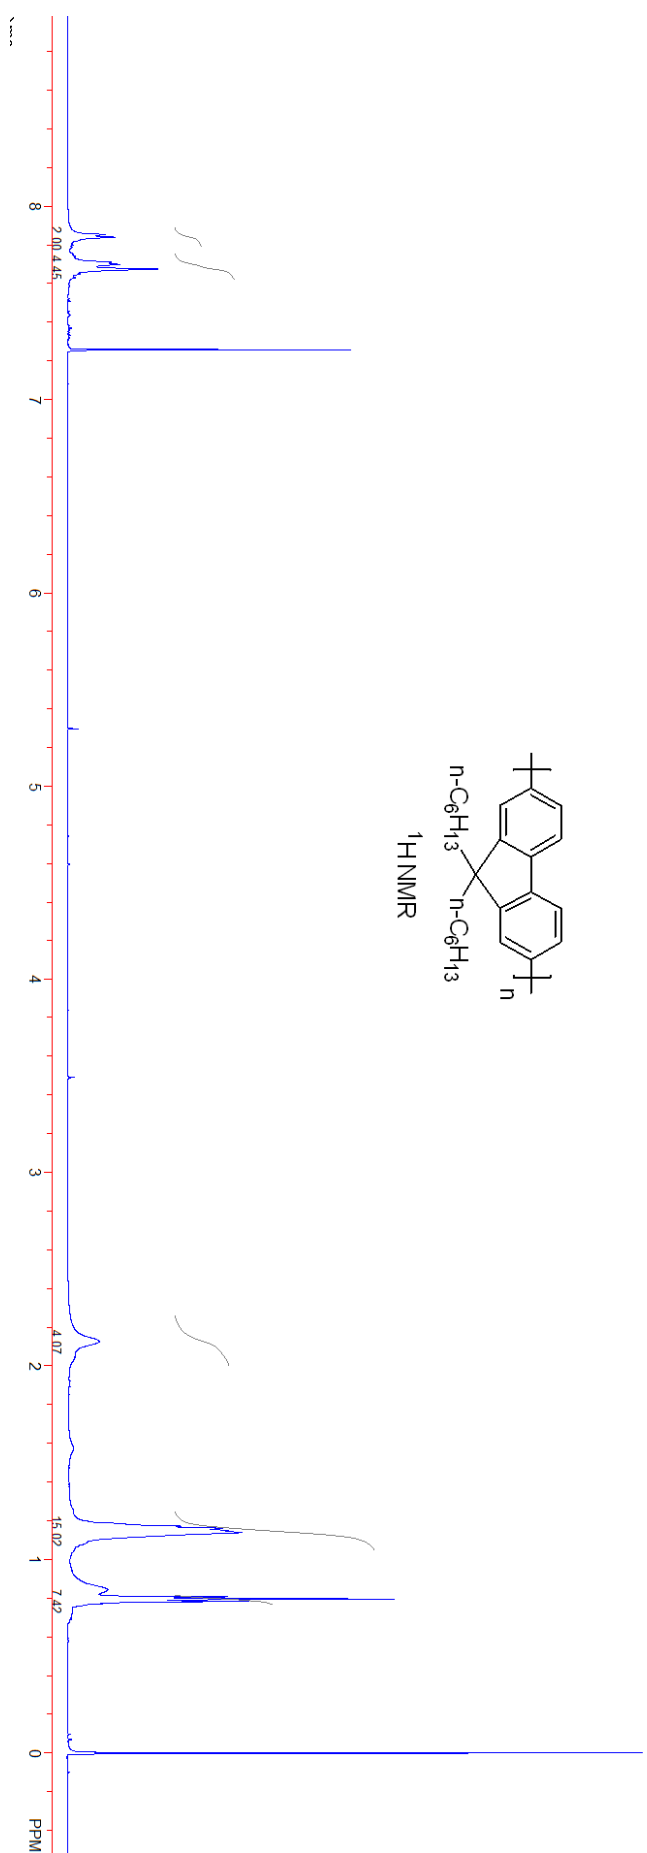



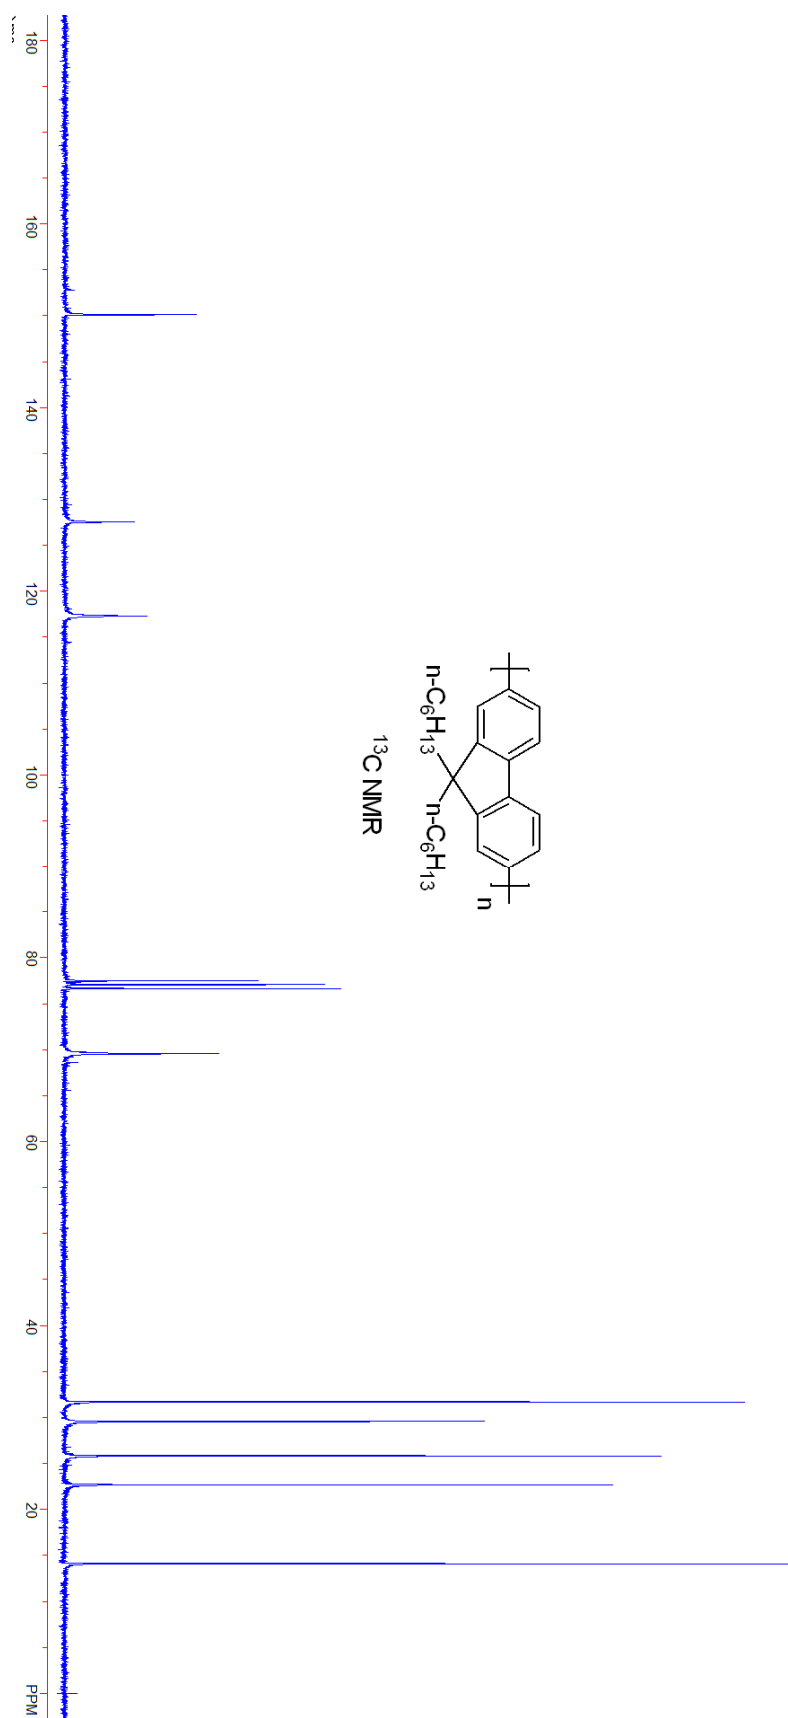

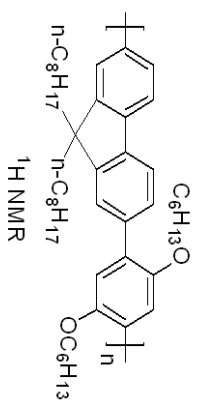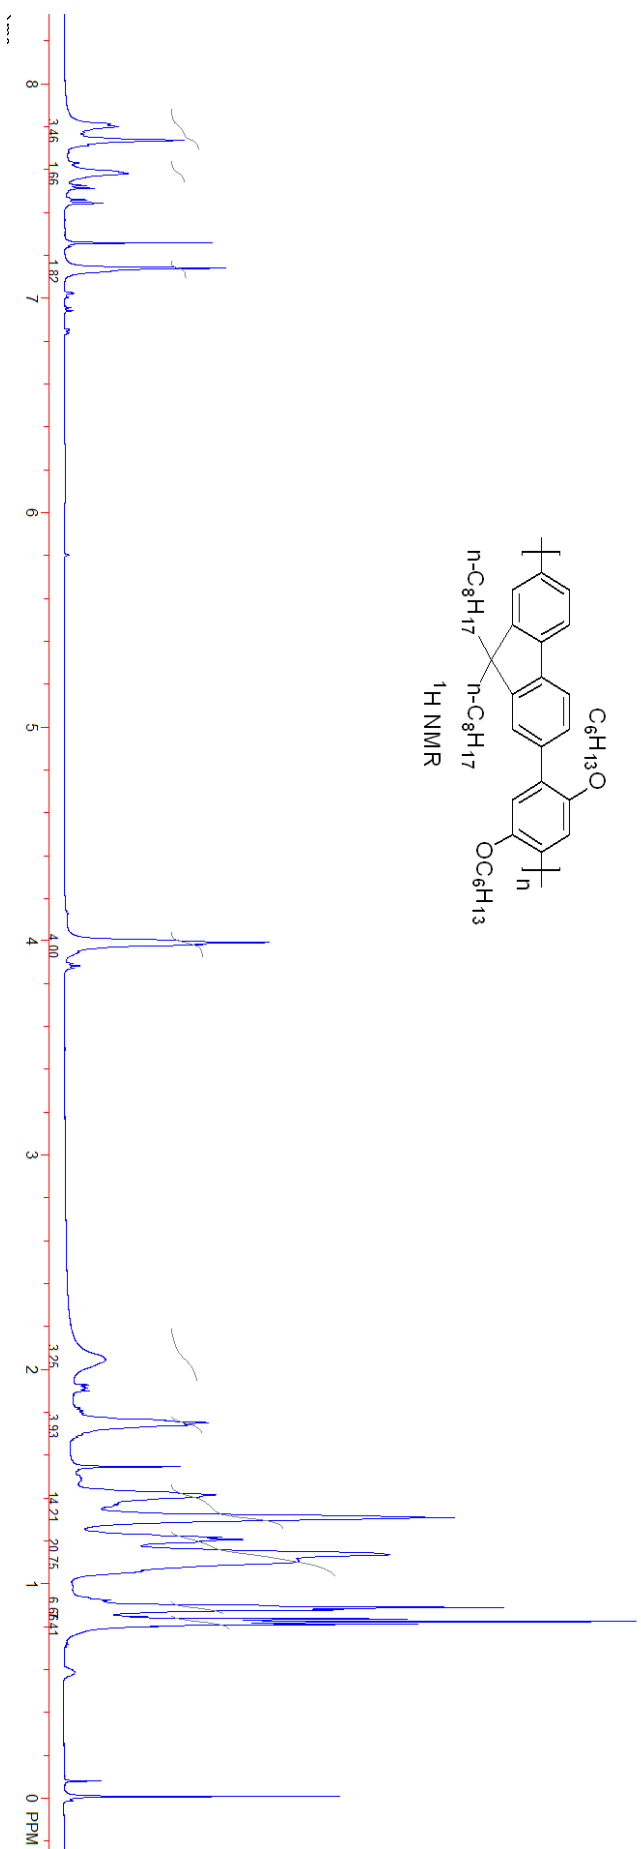

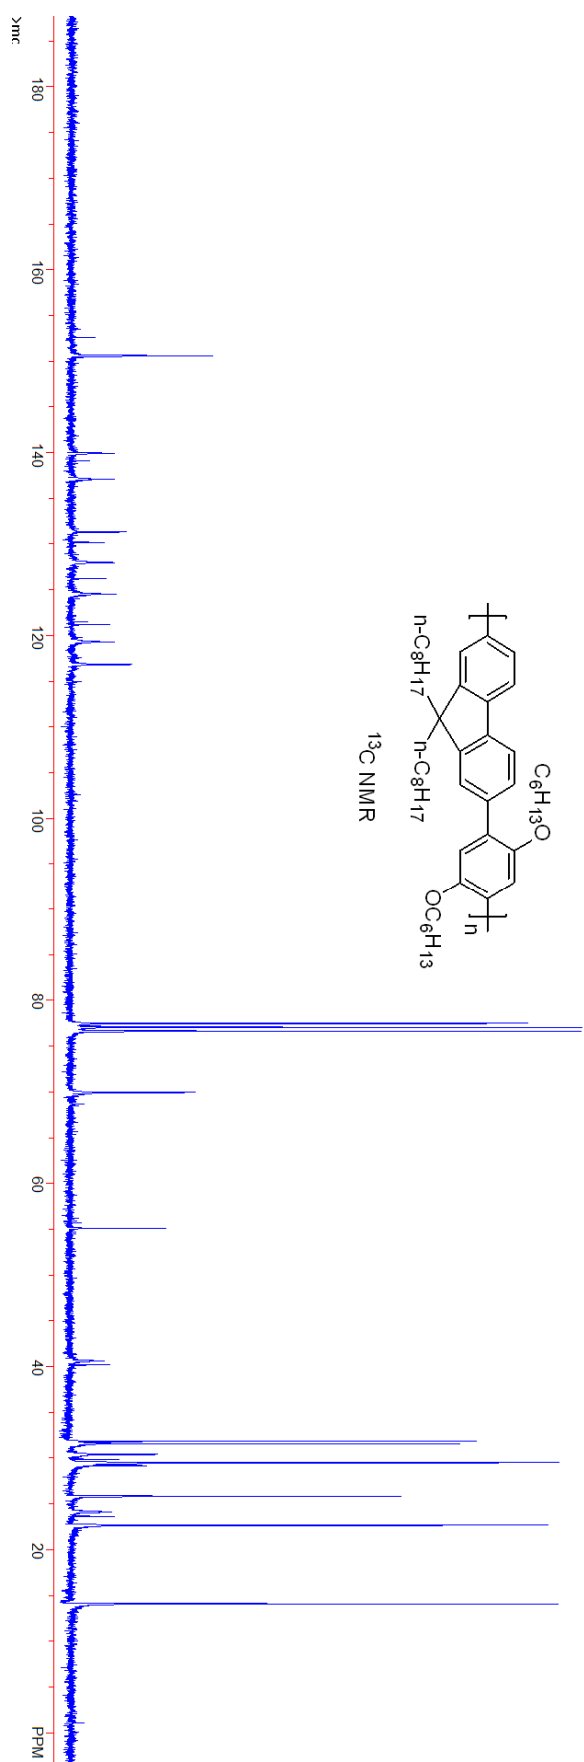

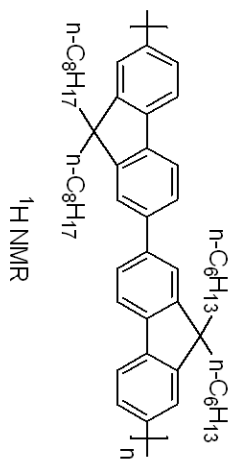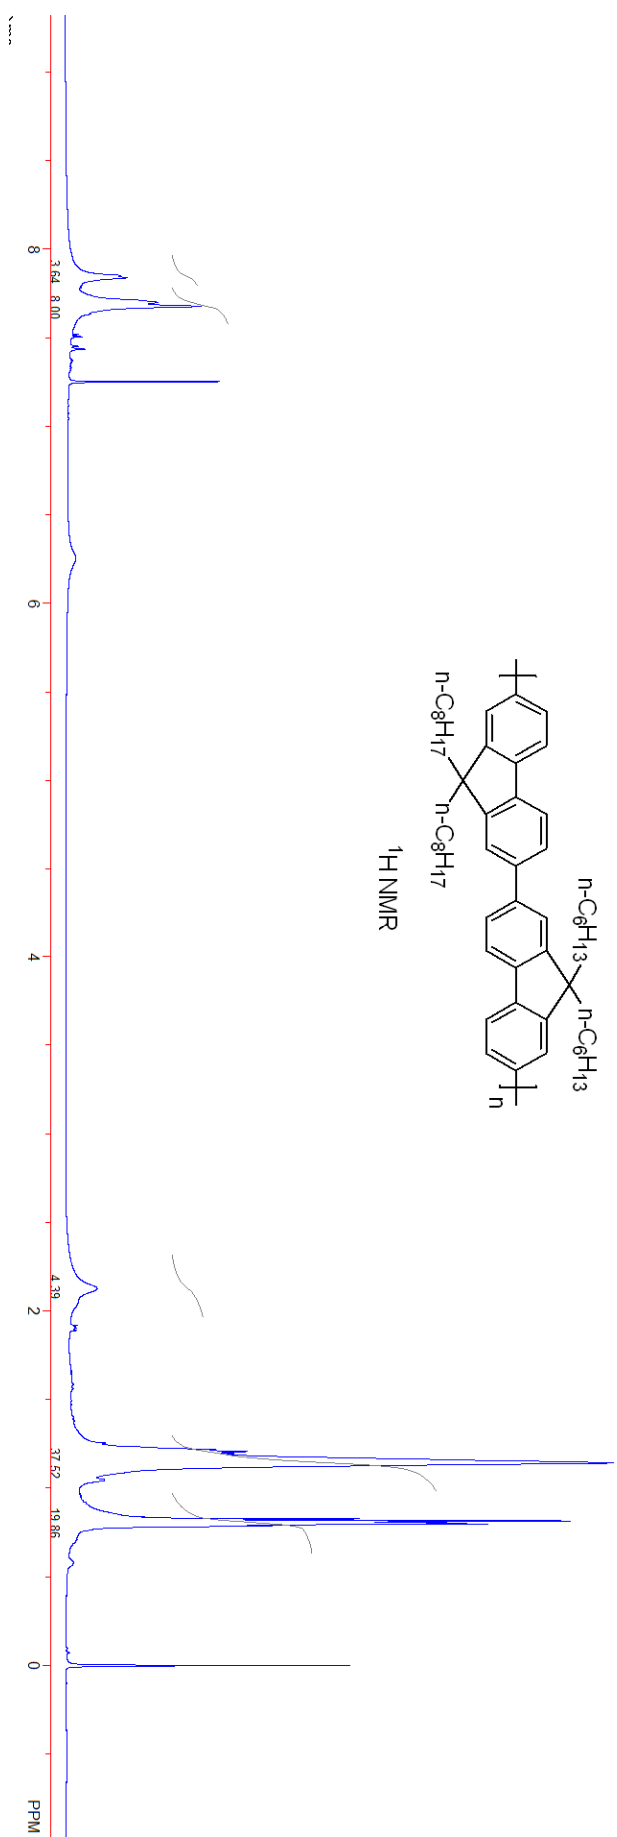

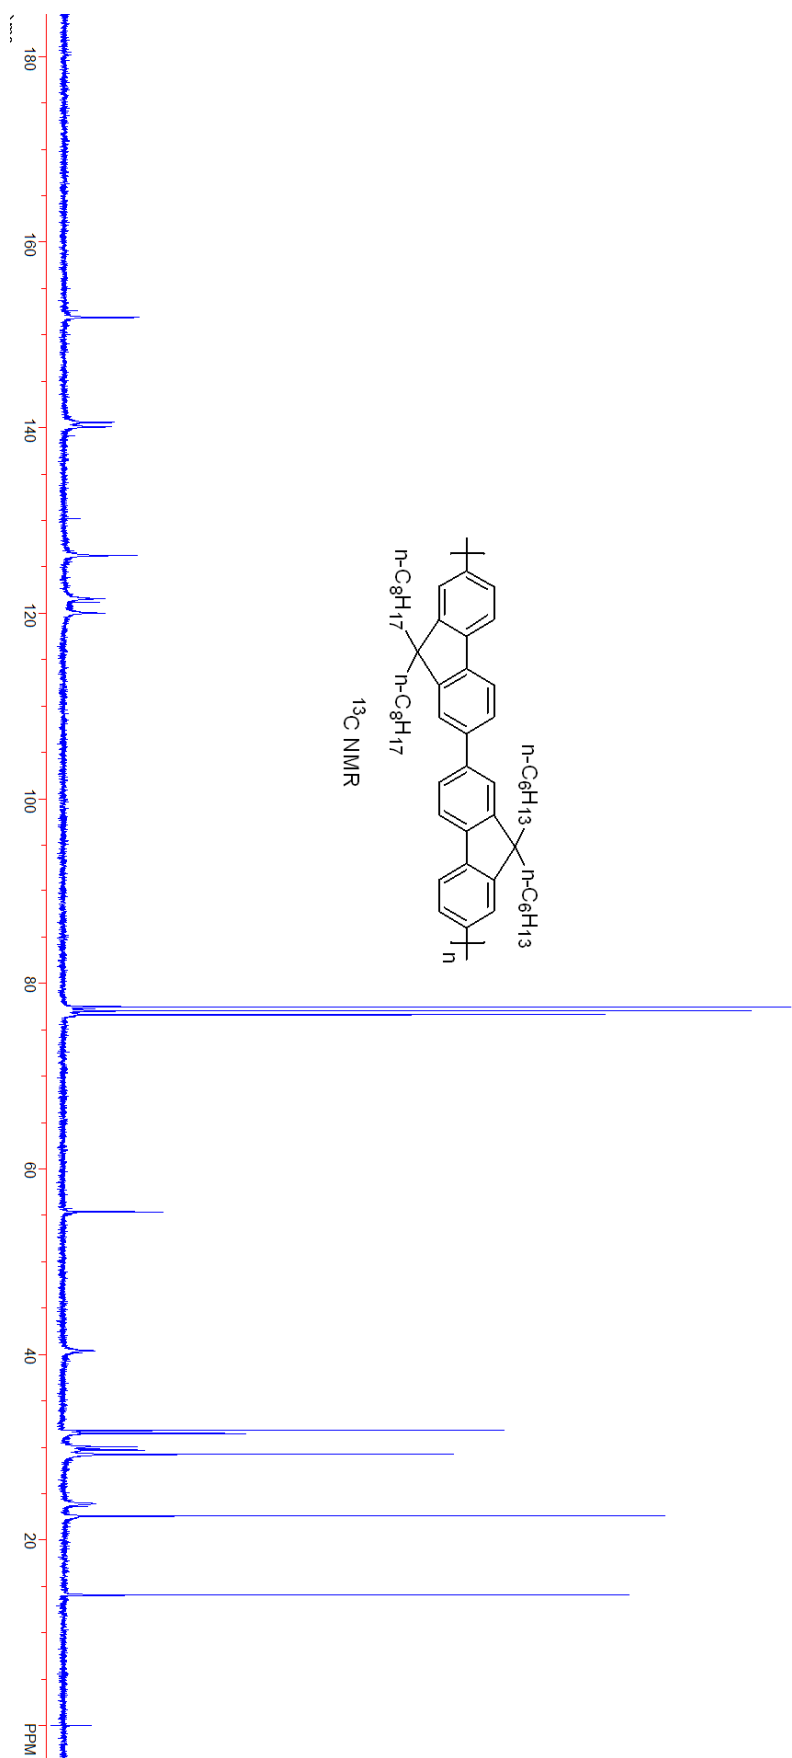

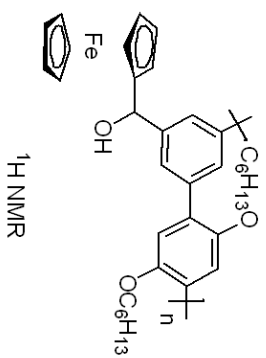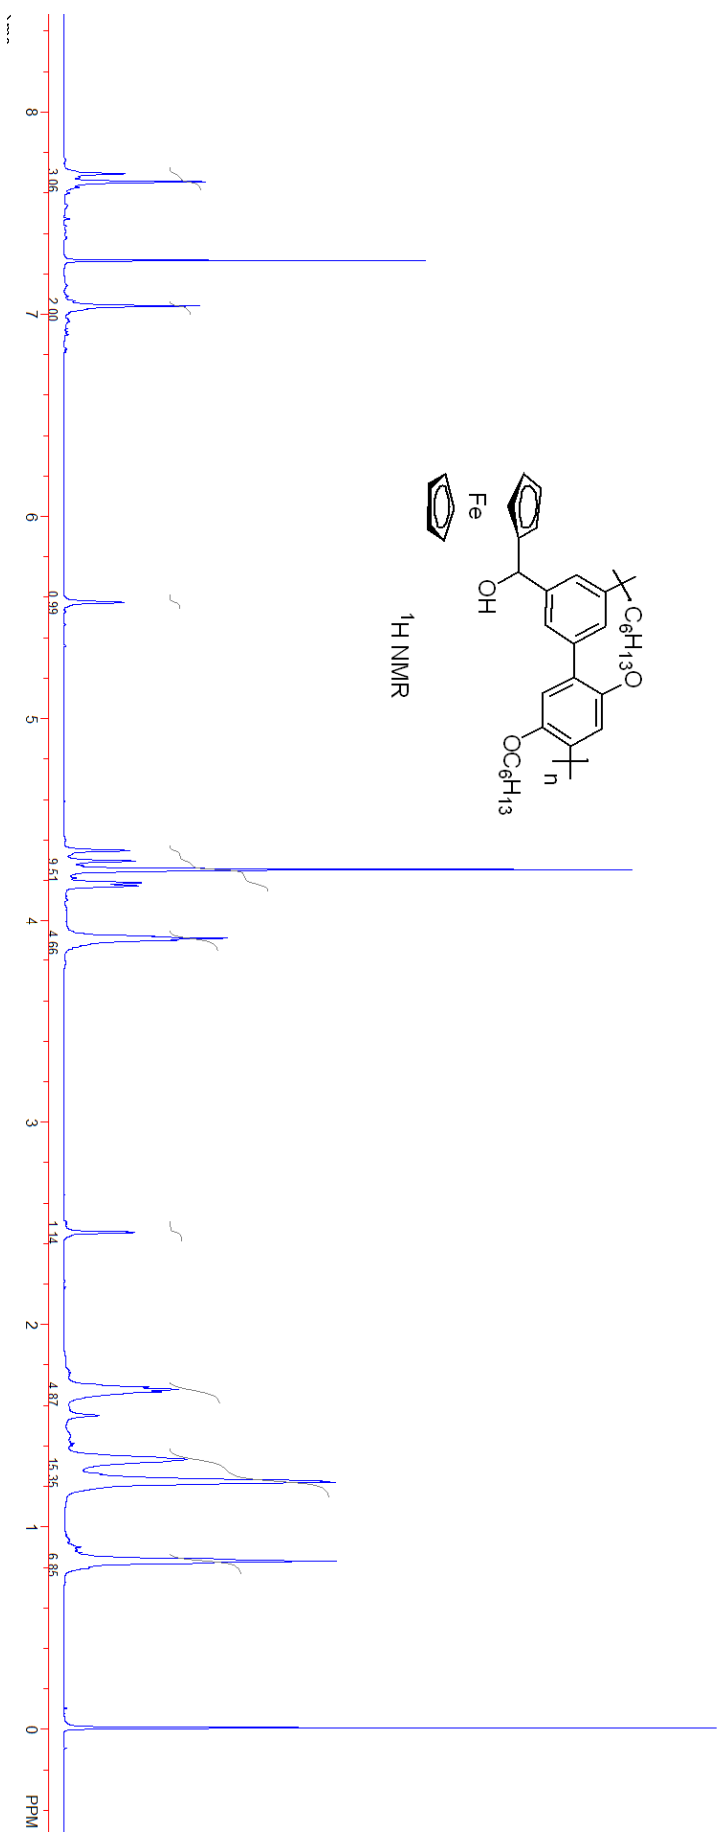

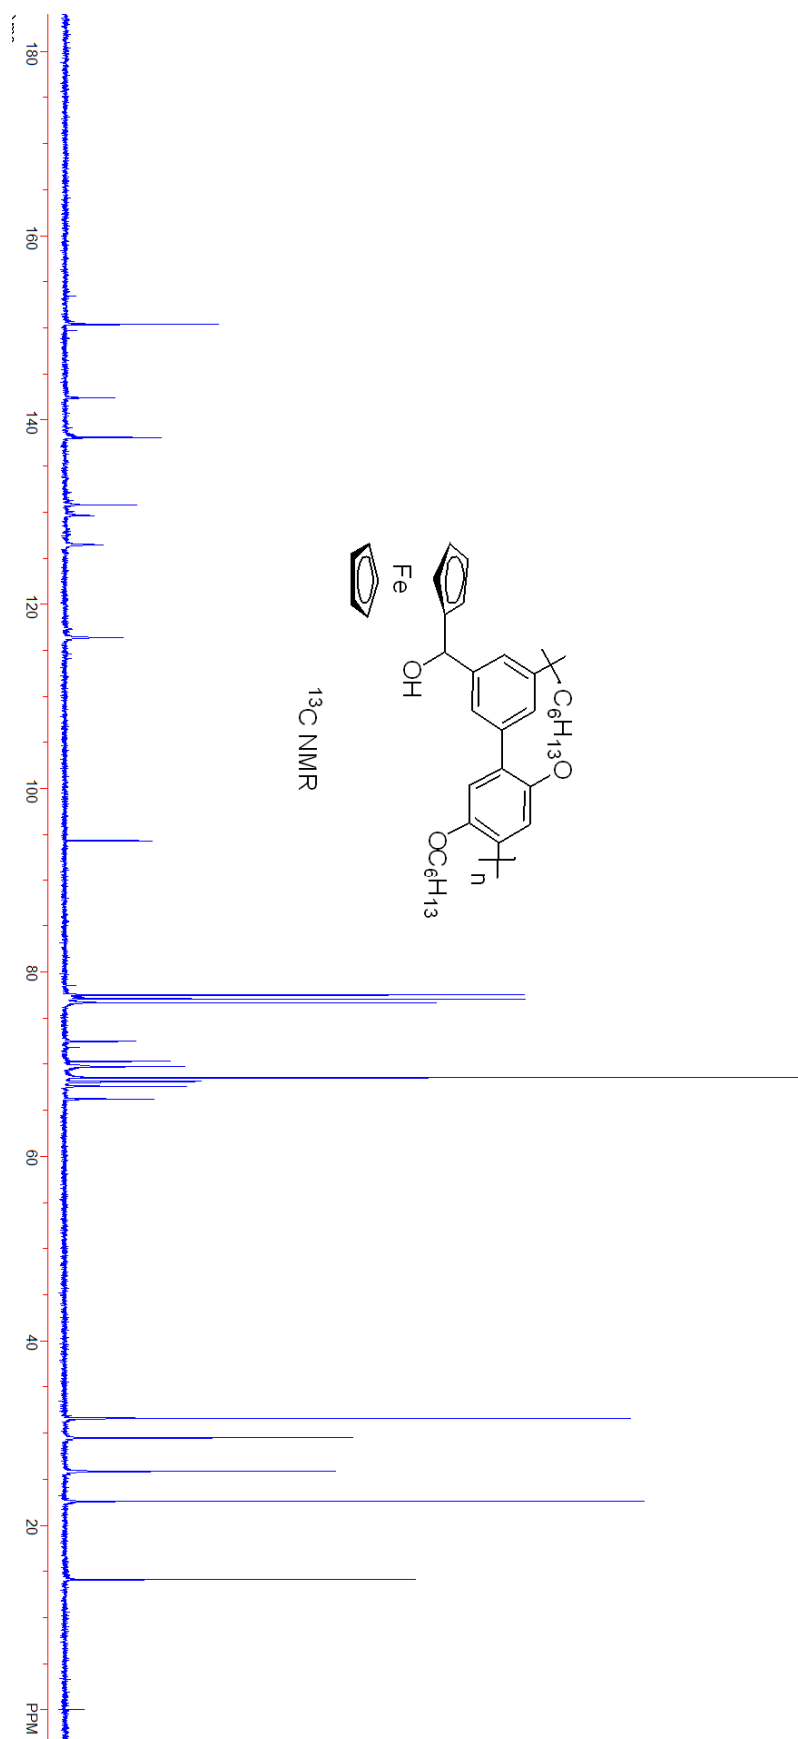

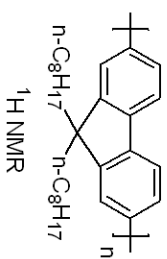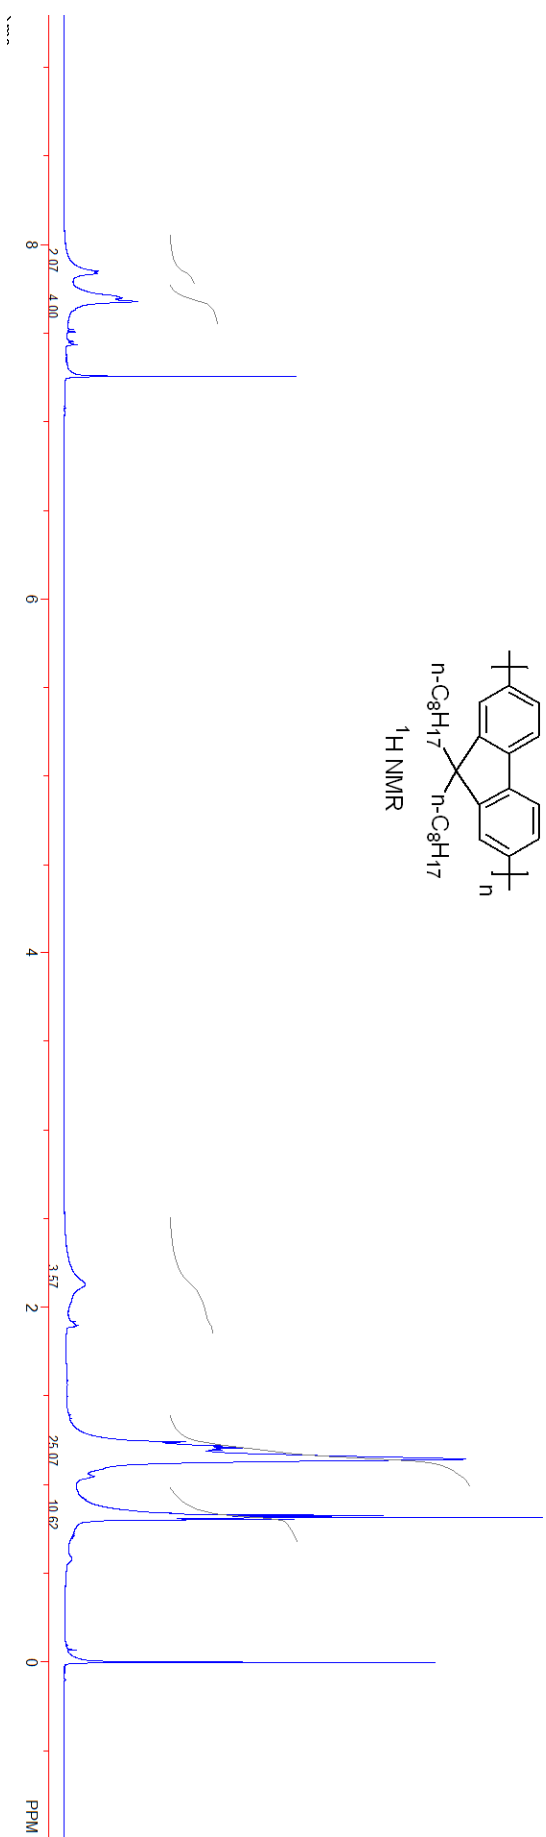



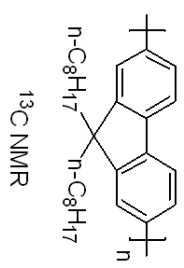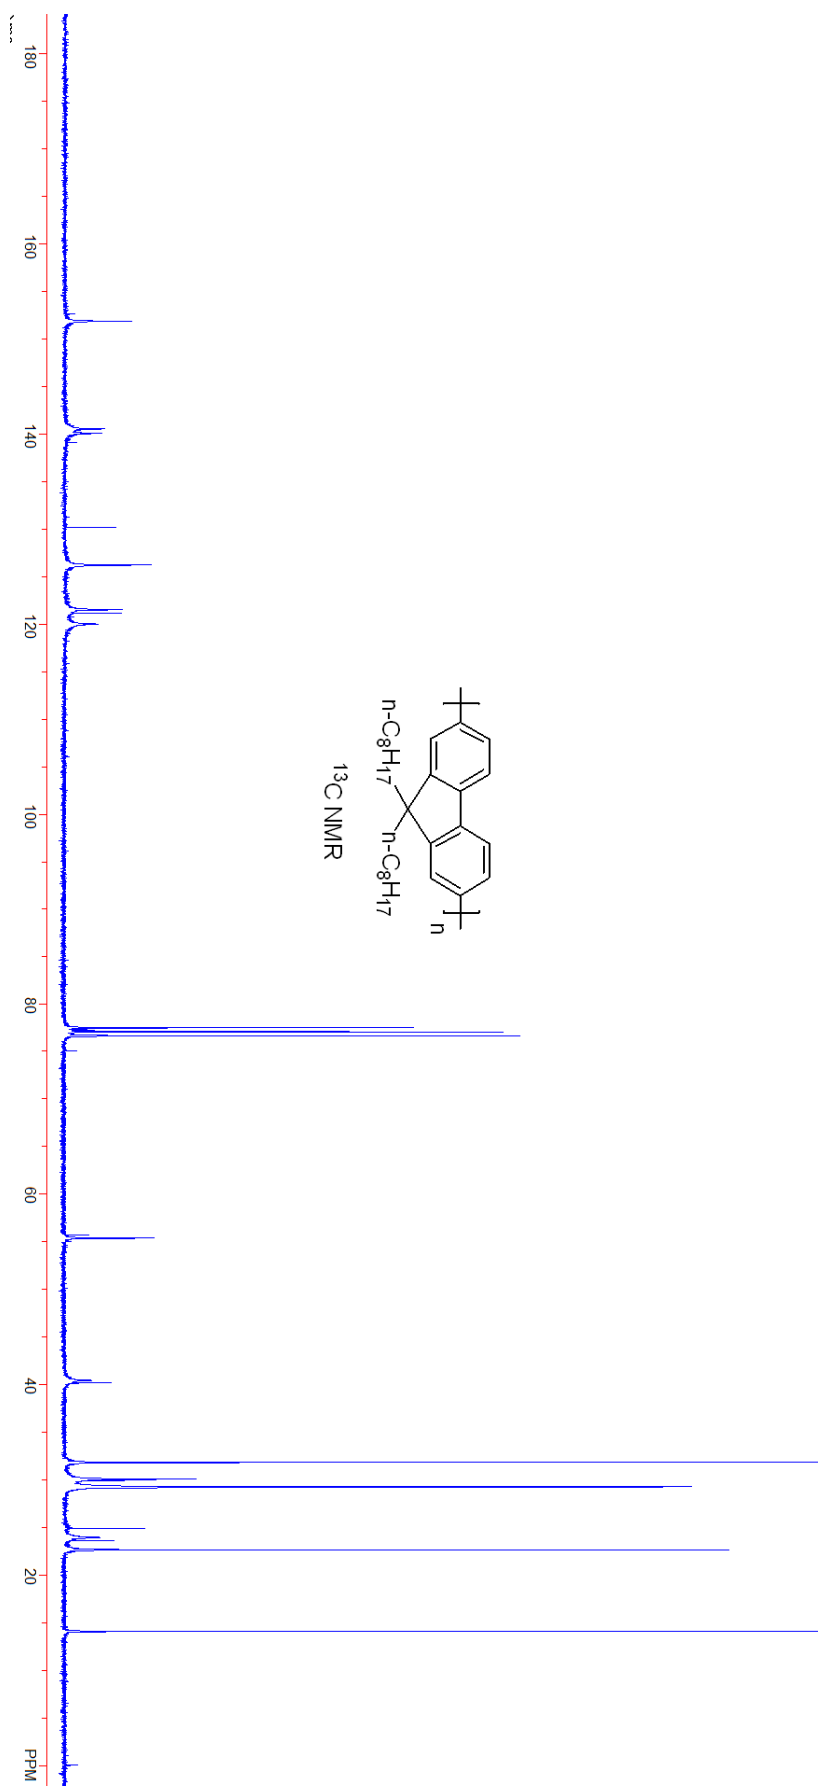

Supplement: Supplementary file 1 [file 4095205]
